# Supplementary material
Source: PubMed Central journal article supplement (PMC4722242)

**a**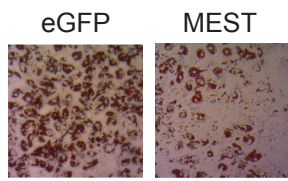**b**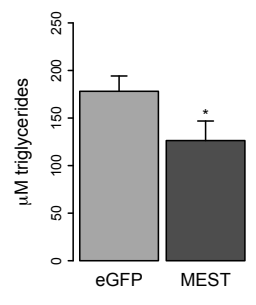**c**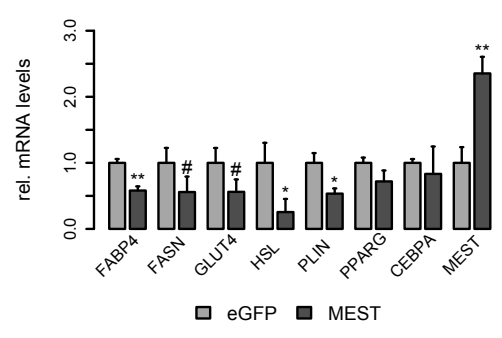

Supplement: ijo2015121x2.pdf [file ijo2015121x2.pdf]
